# Supplementary material for: 5-Hydroxymethylome in Circulating Cell-free DNA as A Potential Biomarker for Non-small-cell Lung Cancer
Source: PubMed Central journal article supplement (PMC6076378; doi:10.1016/j.gpb.2018.06.002), 2018-07-18

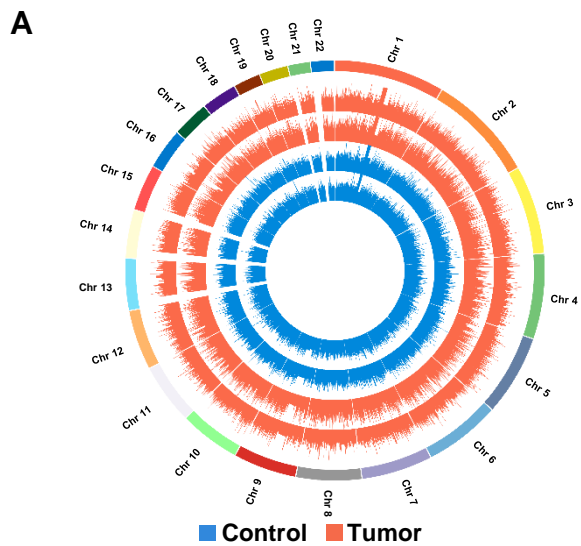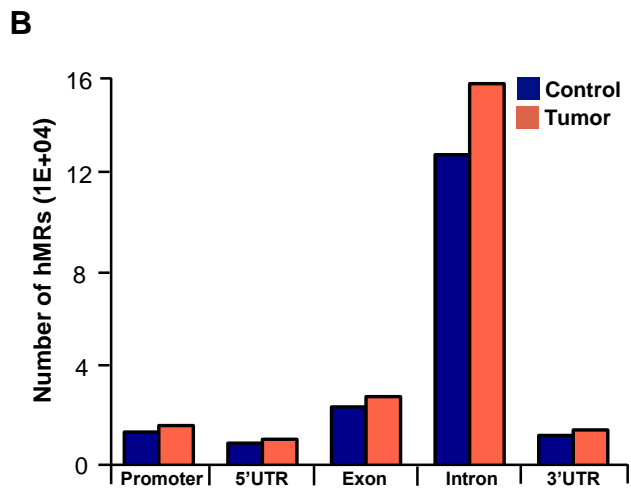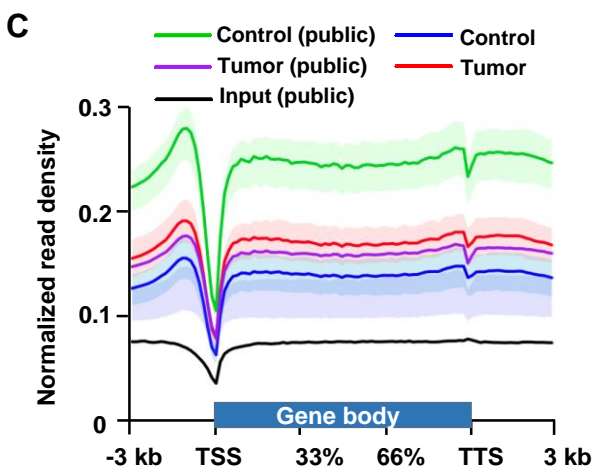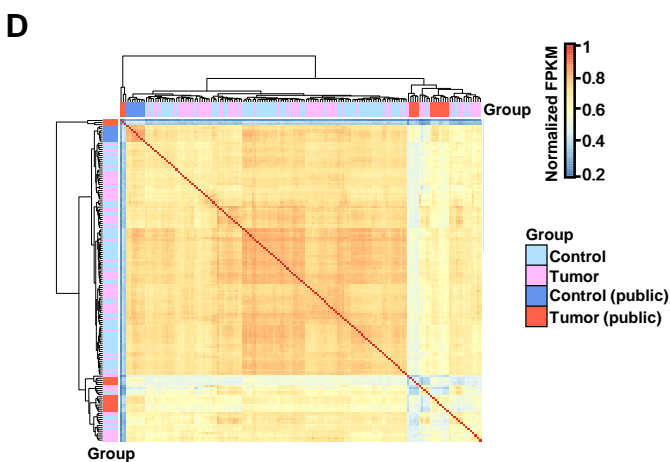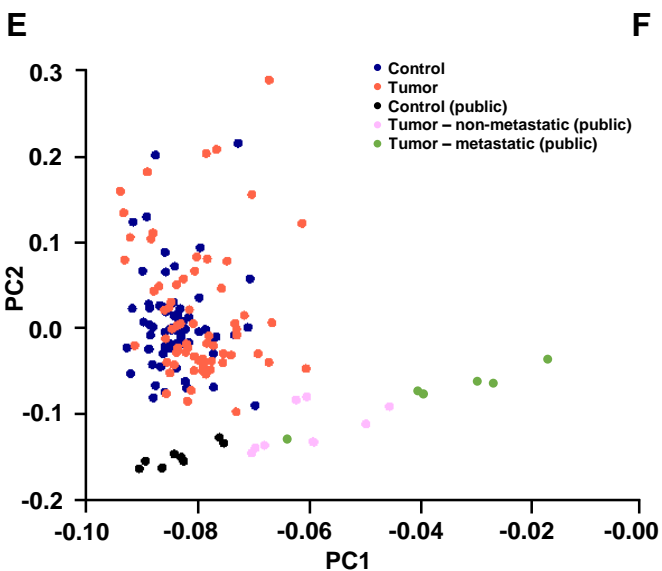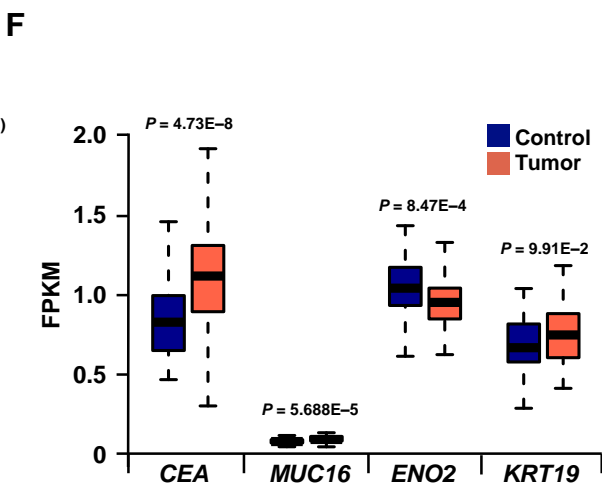

Supplement: mmc1.pdf [file mmc1.pdf]
