# Supplementary material for: 5-Hydroxymethylome in Circulating Cell-free DNA as A Potential Biomarker for Non-small-cell Lung Cancer
Source: PubMed Central journal article supplement (PMC6076378; doi:10.1016/j.gpb.2018.06.002), 2018-07-18

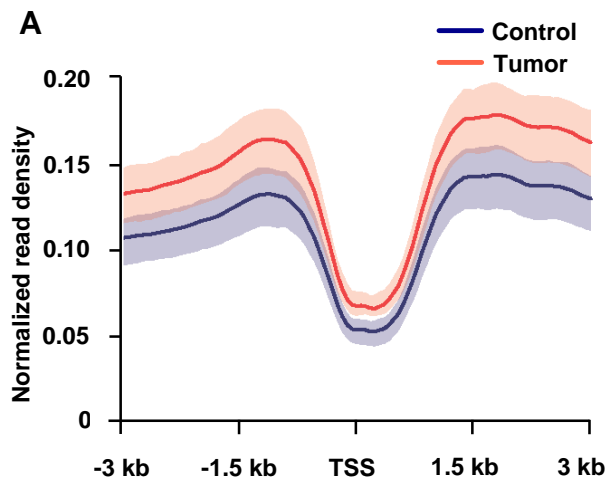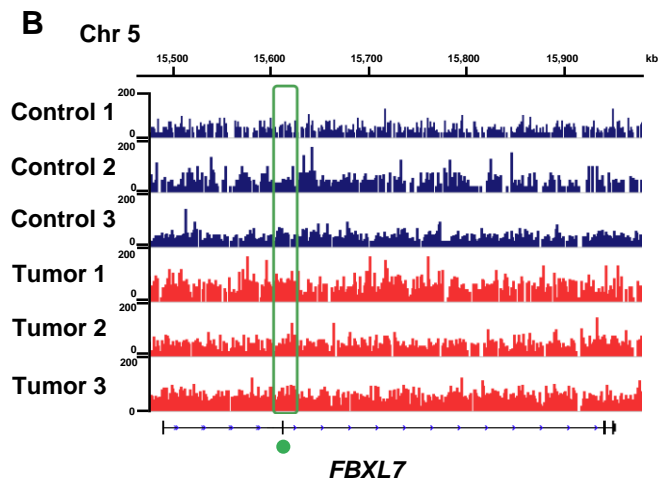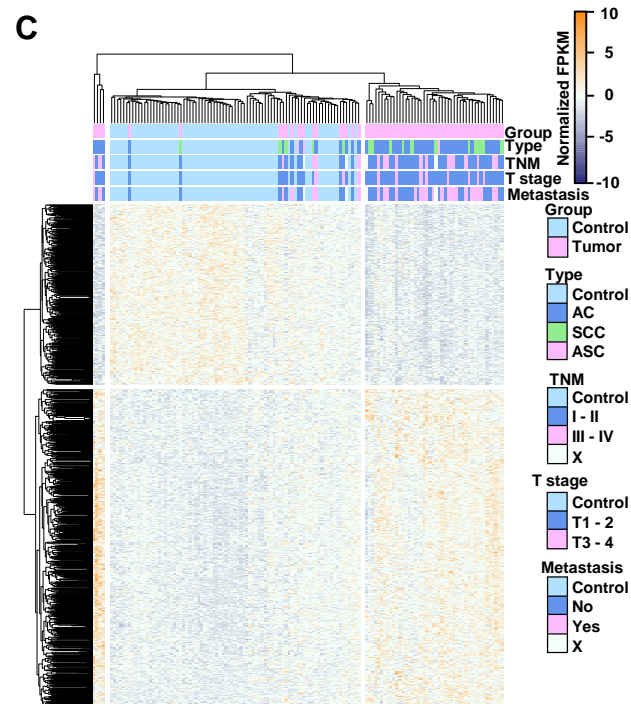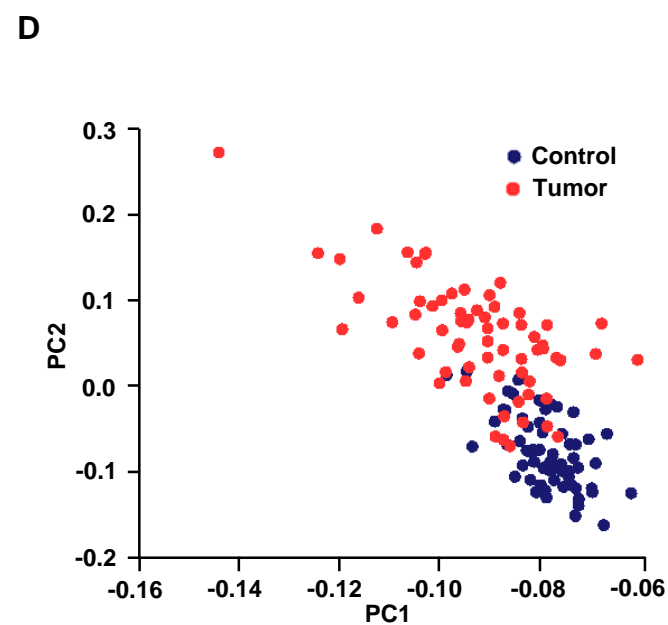

**E** Genes with hyper-hydroxymethylated promoters

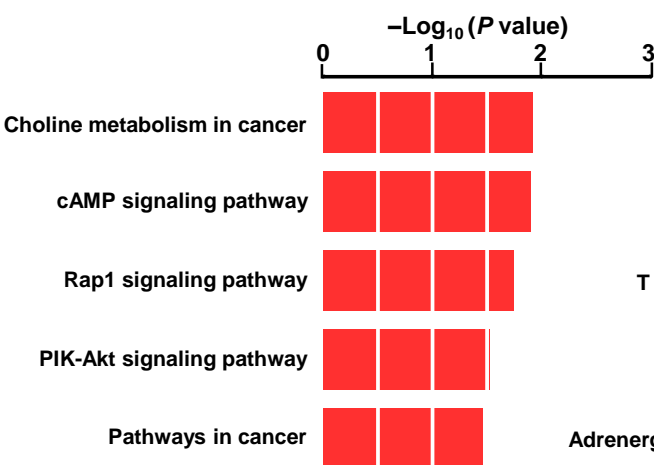

**F** Genes with hypo-hydroxymethylated promoters

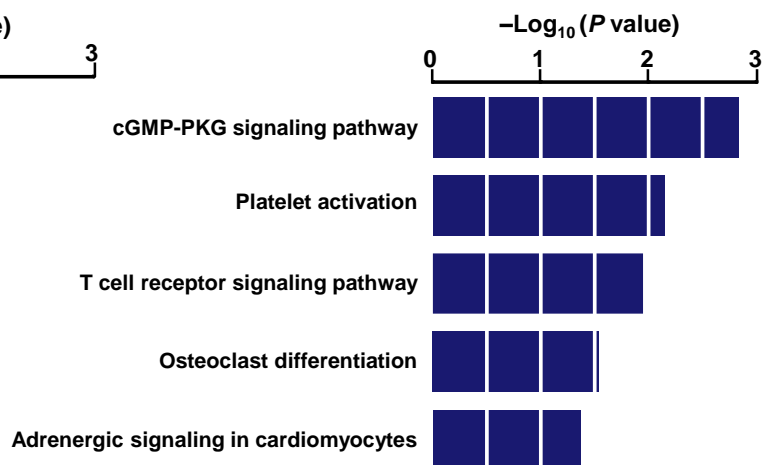

Supplement: mmc2.pdf [file mmc2.pdf]
