# Supplementary material for: 5-Hydroxymethylome in Circulating Cell-free DNA as A Potential Biomarker for Non-small-cell Lung Cancer
Source: PubMed Central journal article supplement (PMC6076378; doi:10.1016/j.gpb.2018.06.002), 2018-07-18

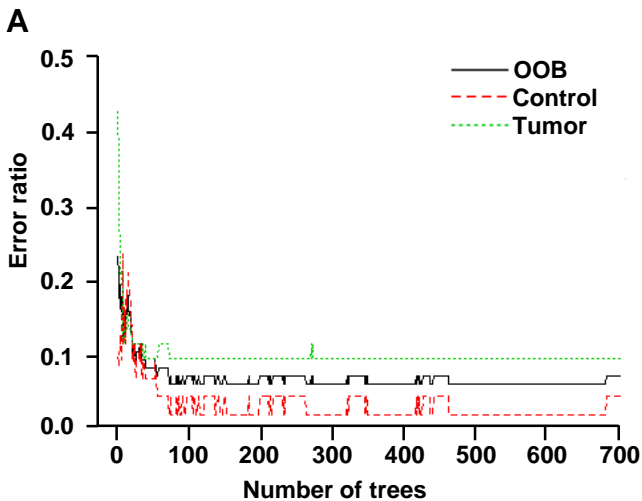

**B**

| Type    | Control | Tumor | Class error |
|---------|---------|-------|-------------|
| Control | 40      | 2     | 0.0476      |
| Tumor   | 5       | 46    | 0.0980      |

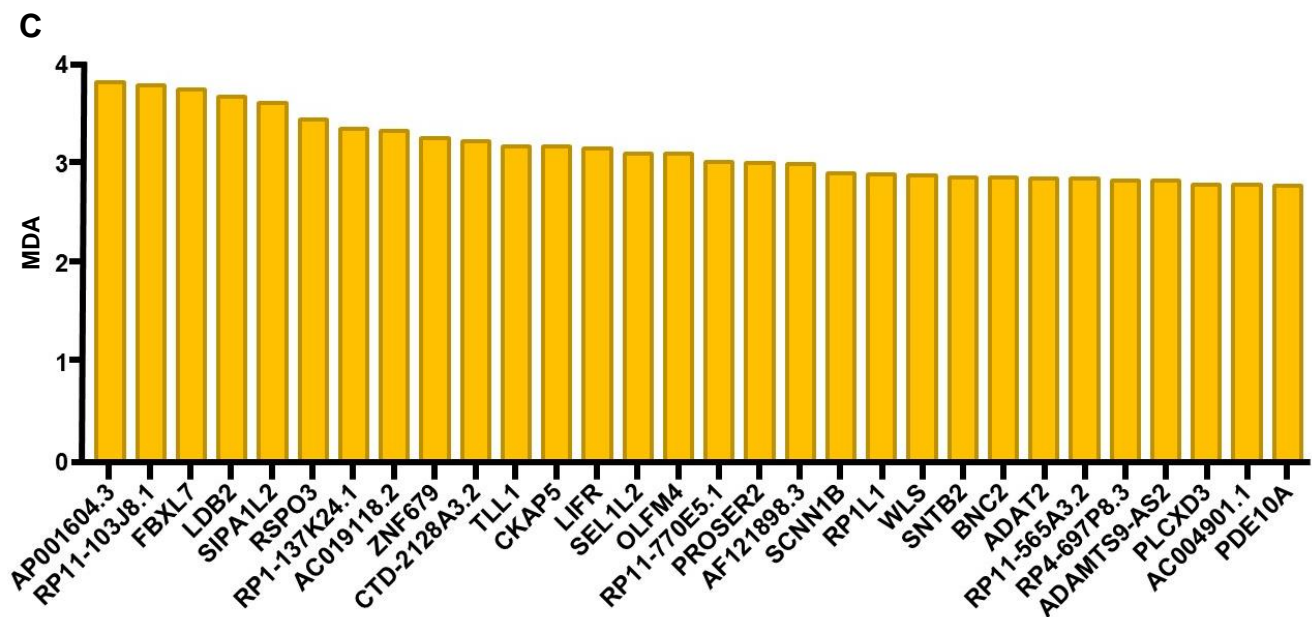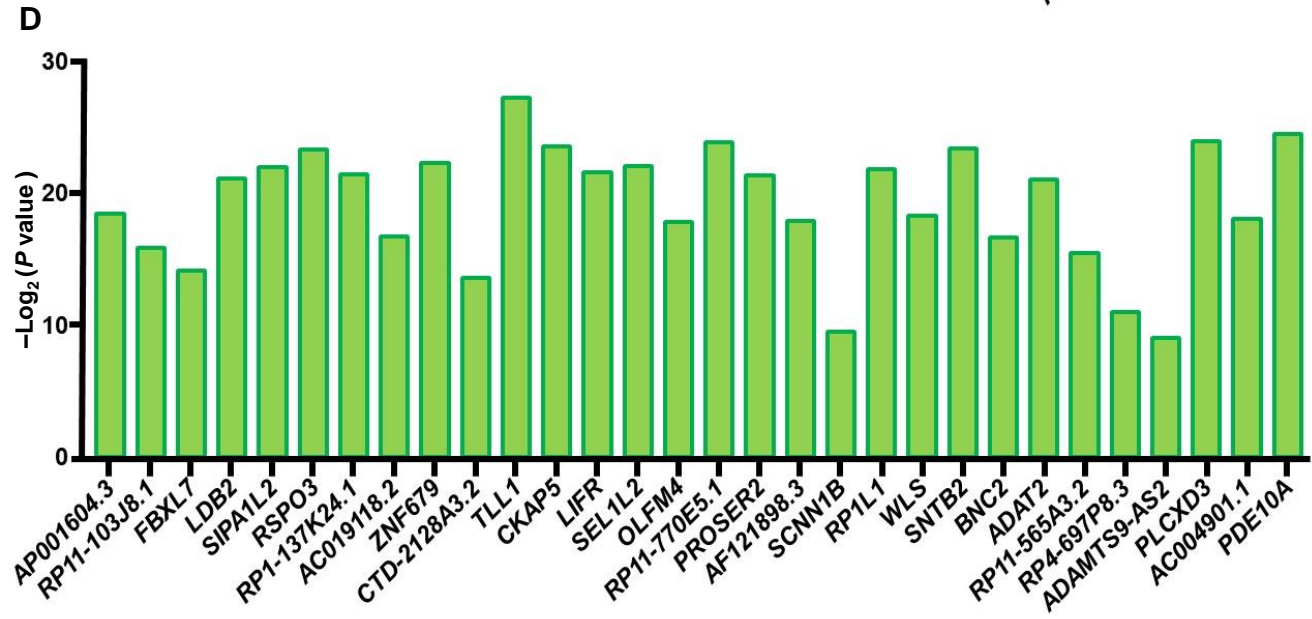

Supplement: mmc3.pdf [file mmc3.pdf]
